# Supplementary material for: Controlled preparation of In2O3, InOOH and In(OH)3via a one-pot aqueous solvothermal route
Source: Royal Society of Chemistry journal article supplement (doi:10.1039/b809313j), 2008-01-01
Supplement: b809313j.pdf [file b809313j.pdf]

Supplementary Material (ESI) for New Journal of Chemistry  
This journal is © The Royal Society of Chemistry and  
The Centre National de la Recherche Scientifique, 2008

## Electronic Supplementary Information

### Controlled preparation of $\text{In}_2\text{O}_3$ , $\text{InOOH}$ , and $\text{In}(\text{OH})_3$ via a one-pot aqueous solvothermal route

Tingjiang Yan, Xuxu Wang\*, Jinlin Long, Huaxiang Lin, Rusheng Yuan, Wenxin Dai, Zhaohui Li, and

Xianzhi Fu\*

*State Key Laboratory Breeding Base of photocatalysis, Research Institute of photocatalysis, Fuzhou University,*

*Fuzhou 350002, China*

---

\* Corresponding authors: Xuxu Wang, Xianzhi Fu  
E-mail: [xwang@fzu.edu.cn](mailto:xwang@fzu.edu.cn); [xzfu@fzu.edu.cn](mailto:xzfu@fzu.edu.cn)  
Fax: (+86)-591-83738608  
Tel: (+86)-591-83779251

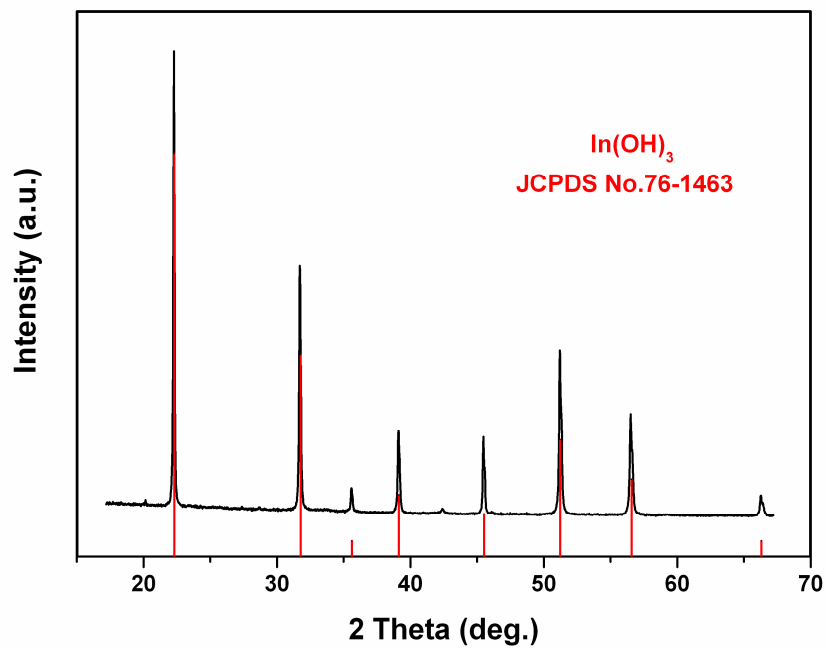

Fig. S1 XRD patterns of the product synthesized under hydrothermal conditions.

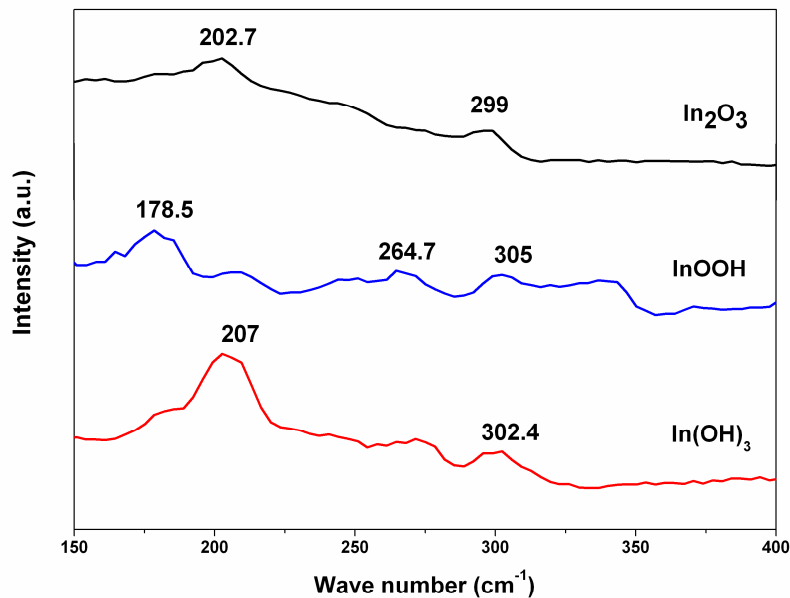

**Fig. S2** Raman spectra of In<sub>2</sub>O<sub>3</sub>, InOOH, and In(OH)<sub>3</sub>.

The Raman spectra were recorded at ambient temperature on a Perkin-Elmer Spectrum 2000 R NIR FT-Raman spectrometer with a Nd/YAG laser and a InGaAs detector. For In<sub>2</sub>O<sub>3</sub>, Raman peaks at 202.7 and 299 cm<sup>-1</sup> are observed. These bands are due to In-O vibrations of InO<sub>6</sub> structural units of the body-centered cubic (bcc) In<sub>2</sub>O<sub>3</sub> structure.<sup>1</sup> In the Raman spectra of InOOH and In(OH)<sub>3</sub>, peaks at 178.5, 264.7, 305 and 207, 302.4 can be seen, respectively, in agreement with the literature.<sup>2</sup> The Raman spectrum reveals the high crystalline quality of the products.

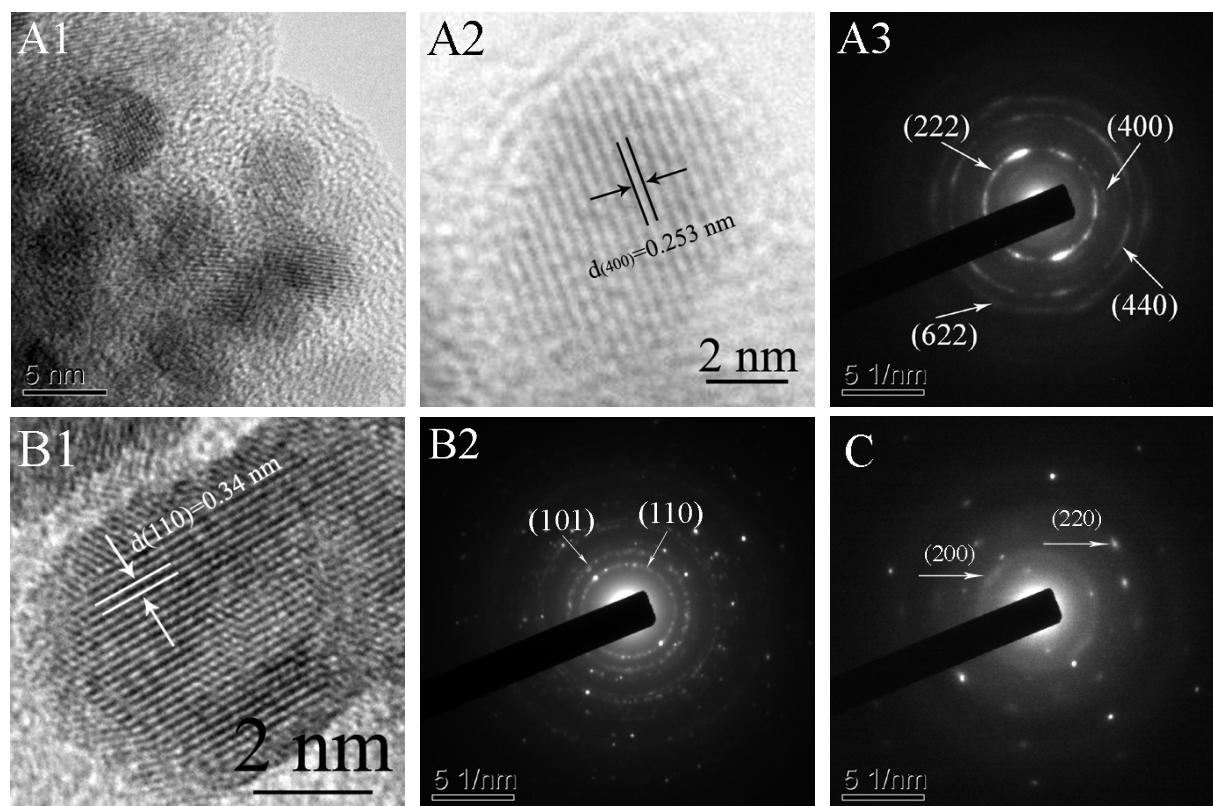

**Fig. S3** HRTEM and SAED patterns of the as-synthesized products: (A1, A2, A3),  $\text{In}_2\text{O}_3$ ; (B1, B2),  $\text{InOOH}$ ; (C)  $\text{In}(\text{OH})_3$ .

#### Notes and references

- 1 W. B. White, and V. G. Keramidas, *Spectrochim. Acta A*, 1972, **28**, 501.
- 2 X. Y. Xue, and M. Kanzaki, *J. Phys. Chem. B*, 2007, **111**, 13156.
